# Supplementary material for: Three non-centrosymmetric bismuth phosphates, Li2ABi(PO4)2(A = K, Rb, and Cs): effects of cations on the crystal structure and SHG response
Source: Royal Society of Chemistry journal article supplement (doi:10.1039/d0qi00778a), 2020-01-01
Supplement: d0qi00778a1.pdf [file d0qi00778a1.pdf]

## Electronic Supplementary Information

### Three non-centrosymmetric bismuth phosphates, $\text{Li}_2\text{ABi}(\text{PO}_4)_2$ (A = K, Rb, and Cs): effects of cation on the crystal structure and SHG response

Ming Wen,<sup>a</sup> Cong Hu,<sup>a</sup> Hongping Wu,<sup>b</sup> Zhihua Yang,<sup>a</sup> H. H. Yu<sup>\*a</sup>, and  
Shilie Pan<sup>\*a</sup>

<sup>a</sup> CAS Key Laboratory of Functional Materials and Devices for Special Environments,  
Xinjiang Technical Institute of Physics & Chemistry, CAS; Xinjiang Key Laboratory  
of Electronic Information Materials and Devices, 40-1 South Beijing Road, Urumqi  
830011, China.

<sup>b</sup> Tianjin Key Laboratory of Functional Crystal Materials, Institute of Functional  
Crystal, Tianjin University of Technology, Tianjin 300384, China.

*slpan@ms.xjb.ac.cn*

*E-mail: slpan@ms.xjb.ac.cn*

## CONTENTS

|                                                                                                                                                                                                                                                                                     |    |
|-------------------------------------------------------------------------------------------------------------------------------------------------------------------------------------------------------------------------------------------------------------------------------------|----|
| Fig. S1 Experimental and calculated XRD patterns of (a) $\text{Li}_2\text{KBi}(\text{PO}_4)_2$ , (b) $\text{Li}_2\text{RbBi}(\text{PO}_4)_2$ , and (c) $\text{Li}_2\text{CsBi}(\text{PO}_4)_2$ .....                                                                                | 1  |
| Fig. S2 TG-DSC curves of (a) $\text{Li}_2\text{KBi}(\text{PO}_4)_2$ , (b) $\text{Li}_2\text{RbBi}(\text{PO}_4)_2$ , and (c) $\text{Li}_2\text{CsBi}(\text{PO}_4)_2$ .....                                                                                                           | 2  |
| Fig. S3 IR spectra of (a) $\text{Li}_2\text{KBi}(\text{PO}_4)_2$ , (b) $\text{Li}_2\text{RbBi}(\text{PO}_4)_2$ , and (c) $\text{Li}_2\text{CsBi}(\text{PO}_4)_2$ . ....                                                                                                             | 3  |
| Fig. S4 UV-vis-NIR diffuse reflectance spectra of (a) $\text{Li}_2\text{KBi}(\text{PO}_4)_2$ , (b) $\text{Li}_2\text{RbBi}(\text{PO}_4)_2$ , and (c) $\text{Li}_2\text{CsBi}(\text{PO}_4)_2$ . ....                                                                                 | 4  |
| Fig. S5 Band structures of (a) $\text{Li}_2\text{KBi}(\text{PO}_4)_2$ , (b) $\text{Li}_2\text{RbBi}(\text{PO}_4)_2$ , and (c) $\text{Li}_2\text{CsBi}(\text{PO}_4)_2$ .....                                                                                                         | 5  |
| Fig. S6 Projected density of states of (a) $\text{Li}_2\text{KBi}(\text{PO}_4)_2$ , (b) $\text{Li}_2\text{RbBi}(\text{PO}_4)_2$ , and (c) $\text{Li}_2\text{CsBi}(\text{PO}_4)_2$ . ....                                                                                            | 6  |
| Table S1 Crystal data and structure refinements for (a) $\text{Li}_2\text{KBi}(\text{PO}_4)_2$ , (b) $\text{Li}_2\text{RbBi}(\text{PO}_4)_2$ , and (c) $\text{Li}_2\text{CsBi}(\text{PO}_4)_2$ .....                                                                                | 7  |
| Table S2 Atomic coordinates ( $\times 10^4$ ) and equivalent isotropic displacement parameters ( $\text{\AA}^2 \times 10^3$ ) for (a) $\text{Li}_2\text{KBi}(\text{PO}_4)_2$ , (b) $\text{Li}_2\text{RbBi}(\text{PO}_4)_2$ , and (c) $\text{Li}_2\text{CsBi}(\text{PO}_4)_2$ . .... | 8  |
| Table S3 Selected bond distances ( $\text{\AA}$ ) and angles (deg) for (a) $\text{Li}_2\text{KBi}(\text{PO}_4)_2$ , (b) $\text{Li}_2\text{RbBi}(\text{PO}_4)_2$ , and (c) $\text{Li}_2\text{CsBi}(\text{PO}_4)_2$ .....                                                             | 11 |

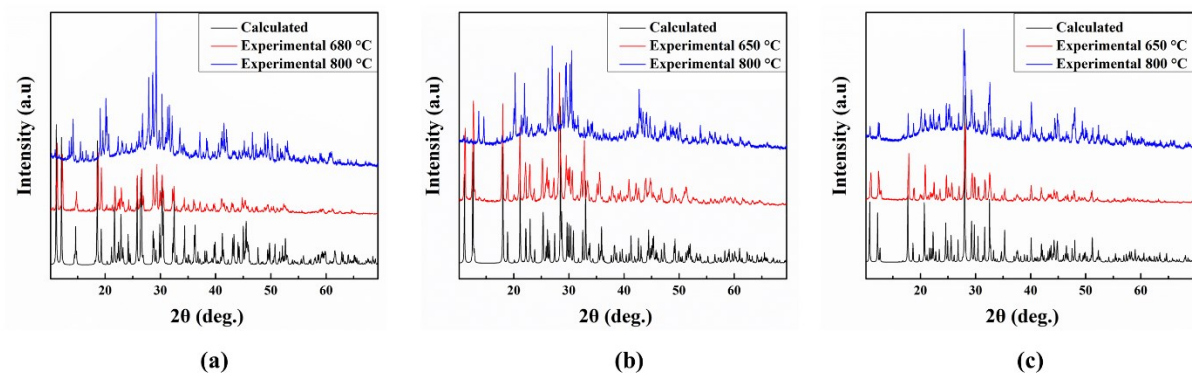

**Fig. S1.** Experimental and calculated XRD patterns of (a)  $\text{Li}_2\text{KBi}(\text{PO}_4)_2$ , (b)  $\text{Li}_2\text{RbBi}(\text{PO}_4)_2$ , and (c)  $\text{Li}_2\text{CsBi}(\text{PO}_4)_2$ .

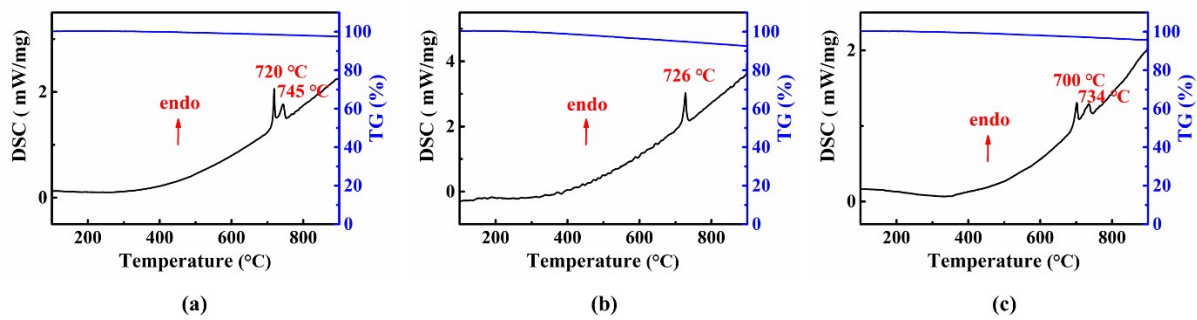

**Fig. S2.** TG-DSC curves of (a)  $\text{Li}_2\text{KBi}(\text{PO}_4)_2$ , (b)  $\text{Li}_2\text{RbBi}(\text{PO}_4)_2$ , and (c)  $\text{Li}_2\text{CsBi}(\text{PO}_4)_2$ .

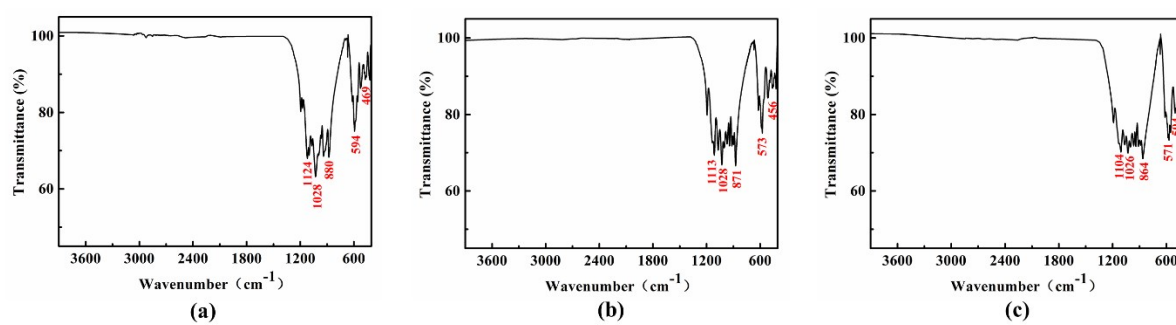

**Fig. S3.** IR spectra of (a)  $\text{Li}_2\text{KBi}(\text{PO}_4)_2$ , (b)  $\text{Li}_2\text{RbBi}(\text{PO}_4)_2$ , and (c)  $\text{Li}_2\text{CsBi}(\text{PO}_4)_2$ .

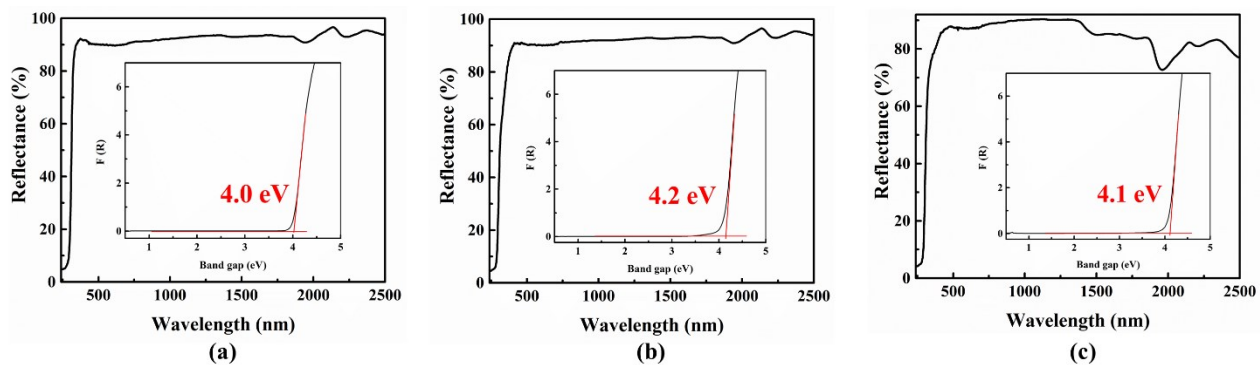

**Fig. S4** UV-vis-NIR diffuse reflectance spectra of (a)  $\text{Li}_2\text{KBi}(\text{PO}_4)_2$ , (b)  $\text{Li}_2\text{RbBi}(\text{PO}_4)_2$ , and (c)  $\text{Li}_2\text{CsBi}(\text{PO}_4)_2$ .

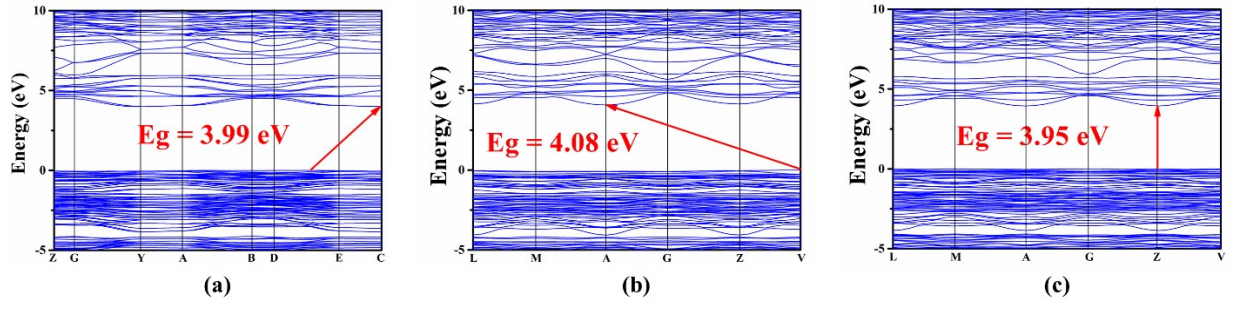

**Fig. S5.** Band structures of (a)  $\text{Li}_2\text{KBi}(\text{PO}_4)_2$ , (b)  $\text{Li}_2\text{RbBi}(\text{PO}_4)_2$ , and (c)  $\text{Li}_2\text{CsBi}(\text{PO}_4)_2$ .

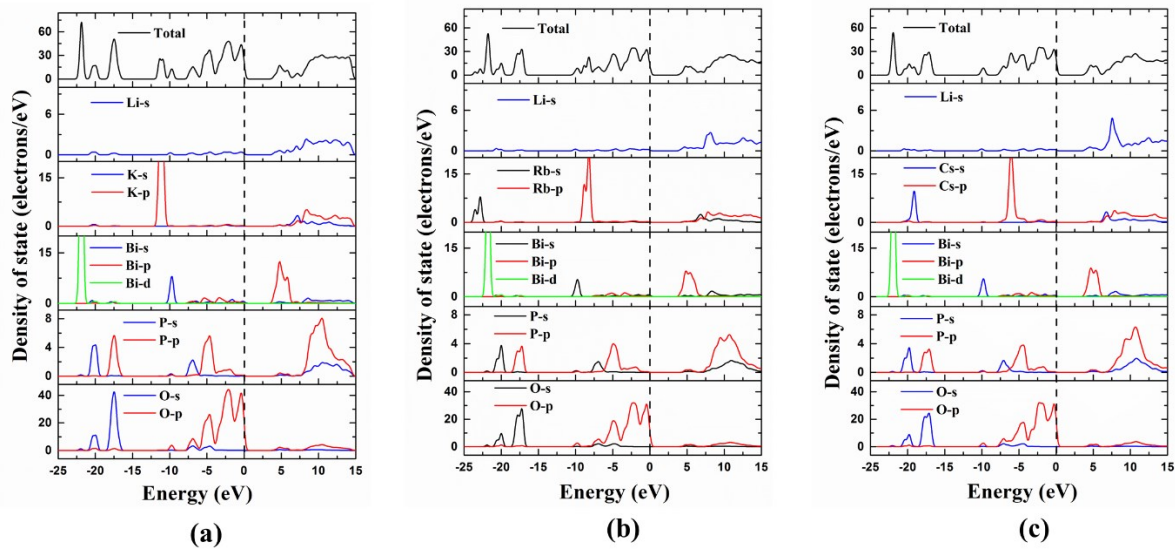

**Fig. S6.** Projected density of states of (a)  $\text{Li}_2\text{KBi}(\text{PO}_4)_2$ , (b)  $\text{Li}_2\text{RbBi}(\text{PO}_4)_2$ , and (c)  $\text{Li}_2\text{CsBi}(\text{PO}_4)_2$ .



**Table S1.** Crystal data and structure refinements for  $\text{Li}_2\text{KBi}(\text{PO}_4)_2$ ,  $\text{Li}_2\text{RbBi}(\text{PO}_4)_2$ , and  $\text{Li}_2\text{CsBi}(\text{PO}_4)_2$ .

| Empirical formula                                             | $\text{Li}_2\text{KBi}(\text{PO}_4)_2$ | $\text{Li}_2\text{RbBi}(\text{PO}_4)_2$ | $\text{Li}_2\text{CsBi}(\text{PO}_4)_2$ |
|---------------------------------------------------------------|----------------------------------------|-----------------------------------------|-----------------------------------------|
| Temperature                                                   |                                        | 296(2) K                                |                                         |
| Wavelength                                                    |                                        | 0.71073 Å                               |                                         |
| Crystal system                                                | Monoclinic                             | Monoclinic                              | Monoclinic                              |
| Space group                                                   | $P2_1$                                 | $C2$                                    | $C2$                                    |
| Formula weight                                                | 451.90                                 | 498.27                                  | 545.71                                  |
| $a$ (Å)                                                       | 7.940(6)                               | 28.17(5)                                | 28.56(4)                                |
| $b$ (Å)                                                       | 4.948(3), $\beta=90.67^\circ$          | 4.994(9), $\beta=91.34^\circ$           | 5.084(7), $\beta=92.32^\circ$           |
| $c$ (Å)                                                       | 18.403                                 | 7.996(14)                               | 8.211(11)                               |
| Z, Volume (Å <sup>3</sup> )                                   | 4, 723.0(9)                            | 6, 1124(3)                              | 6, 1192(3)                              |
| $\rho_{\text{Calcd}}$ (Mg/m <sup>3</sup> )                    | 4.152                                  | 4.415                                   | 4.563                                   |
| $\mu$ (/mm)                                                   | 25.413                                 | 30.409                                  | 27.124                                  |
| F(000)                                                        | 808                                    | 1320                                    | 1428                                    |
| R(int)                                                        | 0.0679                                 | 0.1158                                  | 0.0654                                  |
| Goodness-of-fit on $F^2$                                      | 0.944                                  | 0.952                                   | 0.913                                   |
| Final R indices                                               | $R_1 = 0.0587$ ,                       | $R_1 = 0.0637$                          | $R_1 = 0.0597$                          |
| $[F_o^2 > 2\sigma(F_o^2)]^a$                                  | $wR_2 = 0.1027$                        | $wR_2 = 0.1072$                         | $wR_2 = 0.0985$                         |
| R indices (all data) <sup>a</sup>                             | $R_1 = 0.0745$ ,                       | $R_1 = 0.0866$ ,                        | $R_1 = 0.0781$ ,                        |
|                                                               | $wR_2 = 0.1116$                        | $wR_2 = 0.1174$                         | $wR_2 = 0.1064$                         |
| Largest diff. peak and hole (e <sup>-</sup> Å <sup>-3</sup> ) | 2.7 and -4.9                           | 2.3 and -2.9                            | 2.5 and -1.9                            |

$$^a R_1 = \sum ||F_o| - |F_c|| / \sum |F_o| \text{ and } wR_2 = [\sum w(F_o^2 - F_c^2)^2 / \sum w F_o^4]^{1/2} \text{ for } F_o^2 > 2\sigma(F_o^2)$$

**Table S2a.** Atomic coordinates ( $\times 10^4$ ) and equivalent isotropic displacement parameters ( $\text{\AA}^2 \times 10^3$ ) for  $\text{Li}_2\text{KBi}(\text{PO}_4)_2$ .  $U_{\text{eq}}$  is defined as one-third of the trace of the orthogonalized  $U_{ij}$  tensor.

| Atom   | x         | y          | z         | U(eq)  |
|--------|-----------|------------|-----------|--------|
| Bi(1)  | 4953(1)   | 6166(2)    | 6100(1)   | 15(1)  |
| Bi(2)  | 6889(1)   | 5952(2)    | 8204(1)   | 12(1)  |
| K(1)   | 99(7)     | 6403(17)   | 6423(4)   | 23(2)  |
| K(2)   | 3162(8)   | 1701(13)   | 9332(4)   | 22(2)  |
| Li(1)  | 450(50)   | 11590(100) | 8040(20)  | 14(10) |
| Li(2)  | 8400(50)  | 11350(130) | 5270(20)  | 21(11) |
| Li(3)  | 3500(50)  | 11460(110) | 7170(20)  | 16(10) |
| Li(4)  | 10310(60) | 6650(100)  | 9110(30)  | 21(12) |
| P(1)   | 8054(8)   | 1587(16)   | 9330(4)   | 11(2)  |
| P(2)   | 7244(9)   | 11674(16)  | 6901(4)   | 15(2)  |
| P(3)   | 2775(8)   | 6580(15)   | 7910(4)   | 12(2)  |
| P(4)   | 2441(10)  | 11480(20)  | 5485(4)   | 26(2)  |
| O(1)   | 4370(20)  | 7200(40)   | 8404(11)  | 16(4)  |
| O(2)   | 8030(20)  | 1990(40)   | 10153(10) | 16(5)  |
| O(3)   | 8850(20)  | 12300(40)  | 7324(11)  | 19(5)  |
| O(4)   | 6900(30)  | 8560(40)   | 6867(14)  | 25(5)  |
| O(5)   | 3150(20)  | 7640(40)   | 7136(11)  | 12(4)  |
| O(6)   | 6410(30)  | 2870(40)   | 8979(12)  | 24(5)  |
| O(7)   | 2500(20)  | 3610(40)   | 7893(11)  | 11(4)  |
| O(8)   | 8040(20)  | -1470(40)  | 9172(11)  | 14(5)  |
| O(9)   | 7240(30)  | 12840(50)  | 6111(13)  | 32(6)  |
| O(10)  | 5730(20)  | 13100(40)  | 7283(12)  | 23(5)  |
| O(11)  | 9490(20)  | 2910(40)   | 8965(11)  | 15(4)  |
| O(12)  | 1290(20)  | 8110(40)   | 8241(11)  | 11(4)  |
| O(13)  | 2610(30)  | 8450(40)   | 5488(13)  | 24(5)  |
| O(14)  | 3060(30)  | 12700(50)  | 6185(13)  | 34(6)  |
| O(15A) | 4100(50)  | 13040(90)  | 5060(20)  | 24(8)  |
| O(15B) | 2950(60)  | 12480(90)  | 4790(30)  | 24(8)  |
| O(16A) | 400(40)   | 11730(80)  | 5570(20)  | 21(7)  |
| O(16B) | 960(50)   | 12900(80)  | 5130(30)  | 21(7)  |

**Table S2b.** Atomic coordinates ( $\times 10^4$ ) and equivalent isotropic displacement parameters ( $\text{\AA}^2 \times 10^3$ ) for  $\text{Li}_2\text{RbBi}(\text{PO}_4)_2$ .  $U_{\text{eq}}$  is defined as one-third of the trace of the orthogonalized  $U_{ij}$  tensor.

| Atom  | x        | y         | z        | U(eq)  |
|-------|----------|-----------|----------|--------|
| Bi(1) | 6322(1)  | 10665(3)  | 1896(1)  | 17(1)  |
| Bi(2) | 5000     | 885(5)    | 10000    | 17(1)  |
| Rb(1) | 7913(1)  | 11471(8)  | 1818(4)  | 25(1)  |
| Rb(2) | 5000     | 11185(14) | 5000     | 32(2)  |
| Li(1) | 8100(20) | 6200(160) | 4760(70) | 33(16) |
| Li(2) | 5660(18) | 6530(120) | 8280(70) | 19(14) |
| Li(3) | 6186(19) | 6470(130) | 5560(70) | 24(14) |
| P(1)  | 4529(3)  | 6370(20)  | 7797(11) | 16(2)  |
| P(2)  | 7047(3)  | 6370(20)  | 3156(10) | 14(2)  |
| P(3)  | 6127(3)  | 1369(19)  | 7794(10) | 14(2)  |
| O(1)  | 6104(8)  | -1570(50) | 7440(30) | 17(6)  |
| O(2)  | 4286(8)  | 7100(60)  | 6230(30) | 34(7)  |
| O(3)  | 5040(7)  | 7450(50)  | 7960(30) | 12(5)  |
| O(4)  | 6916(8)  | 3350(50)  | 3080(30) | 10(5)  |
| O(5)  | 4267(7)  | 7790(50)  | 9220(30) | 16(6)  |
| O(6)  | 7567(7)  | 6800(50)  | 3230(30) | 20(6)  |
| O(7)  | 6784(7)  | 7740(50)  | 4560(30) | 15(5)  |
| O(8)  | 6847(8)  | 7660(50)  | 1550(30) | 29(7)  |
| O(9)  | 6356(8)  | 2900(50)  | 6360(30) | 17(6)  |
| O(10) | 6449(7)  | 1920(50)  | 9380(30) | 19(5)  |
| O(11) | 4509(8)  | 3230(50)  | 8100(30) | 21(6)  |
| O(12) | 5634(7)  | 2550(50)  | 8260(30) | 11(5)  |

**Table S2c.** Atomic coordinates ( $\times 10^4$ ) and equivalent isotropic displacement parameters ( $\text{\AA}^2 \times 10^3$ ) for  $\text{Li}_2\text{CsBi}(\text{PO}_4)_2$ .  $U_{\text{eq}}$  is defined as one-third of the trace of the orthogonalized  $U_{ij}$  tensor.

| Atom  | x        | y          | z        | U(eq)  |
|-------|----------|------------|----------|--------|
| Cs(1) | 2871(1)  | 843(4)     | 6711(2)  | 20(1)  |
| Cs(2) | 5000     | 5736(6)    | 0        | 24(1)  |
| Bi(1) | 3691(1)  | 5045(2)    | 3087(1)  | 13(1)  |
| Bi(2) | 5000     | 5268(4)    | 5000     | 13(1)  |
| Li(1) | 3832(17) | 10660(110) | -470(60) | 20(12) |
| Li(2) | 4344(18) | 730(120)   | 6490(60) | 23(13) |
| Li(3) | 1921(17) | 990(100)   | 330(60)  | 15(11) |
| P(1)  | 4523(2)  | 10756(16)  | 2850(9)  | 11(2)  |
| P(2)  | 2978(3)  | 759(16)    | 1732(9)  | 11(2)  |
| P(3)  | 3878(3)  | 5752(16)   | 7129(9)  | 14(2)  |
| O(1)  | 4530(8)  | 7720(40)   | 3160(30) | 17(5)  |
| O(2)  | 4269(7)  | 12100(40)  | 4280(20) | 14(5)  |
| O(3)  | 3165(7)  | 2150(40)   | 3370(20) | 9(4)   |
| O(4)  | 4270(7)  | 11350(40)  | 1240(20) | 17(5)  |
| O(5)  | 3231(8)  | 2220(40)   | 390(30)  | 20(5)  |
| O(6)  | 2458(7)  | 1070(40)   | 1660(30) | 21(5)  |
| O(7)  | 3555(7)  | 6020(40)   | 5570(20) | 14(5)  |
| O(8)  | 3917(8)  | 2880(40)   | 7550(30) | 17(5)  |
| O(9)  | 4363(7)  | 6890(40)   | 6720(20) | 10(4)  |
| O(10) | 5025(7)  | 11830(40)  | 2960(20) | 15(5)  |
| O(11) | 3655(7)  | 7300(40)   | 8500(20) | 9(4)   |
| O(12) | 3124(8)  | -2180(40)  | 1810(30) | 16(5)  |

**Table S3a.** Selected distances (Å) and angles (deg) for Li<sub>2</sub>KBi(PO<sub>4</sub>)<sub>2</sub>.

|                |           |                        |           |
|----------------|-----------|------------------------|-----------|
| Bi(1)-O(14)#1  | 2.29(2)   | O(4)#7-K(1)-O(16B)#1   | 130.0(10) |
| Bi(1)-O(4)     | 2.40(2)   | O(9)#6-K(1)-O(16B)#1   | 71.6(9)   |
| Bi(1)-O(15B)#2 | 2.44(5)   | O(14)#1-K(1)-O(16B)#1  | 49.9(9)   |
| Bi(1)-O(13)    | 2.44(2)   | O(3)#6-K(1)-O(16B)#8   | 129.1(9)  |
| Bi(1)-O(15A)#2 | 2.45(5)   | O(16A)#1-K(1)-O(16B)#8 | 72.6(11)  |
| Bi(1)-O(9)#1   | 2.45(2)   | O(5)-K(1)-O(16B)#8     | 127.6(8)  |
| Bi(1)-O(5)     | 2.504(19) | O(13)-K(1)-O(16B)#8    | 62.3(9)   |
| Bi(1)-O(15A)#1 | 2.55(5)   | O(4)#7-K(1)-O(16B)#8   | 86.6(9)   |
| Bi(1)-O(10)#1  | 2.72(2)   | O(9)#6-K(1)-O(16B)#8   | 76.1(9)   |
| Bi(2)-O(6)     | 2.13(2)   | O(14)#1-K(1)-O(16B)#8  | 102.6(9)  |
| Bi(2)-O(1)     | 2.128(18) | O(16B)#1-K(1)-O(16B)#8 | 57.8(7)   |
| Bi(2)-O(8)#3   | 2.37(2)   | O(3)#6-K(1)-O(16A)     | 161.8(8)  |
| Bi(2)-O(10)#1  | 2.38(2)   | O(16A)#1-K(1)-O(16A)   | 114.1(14) |
| K(1)-O(3)#6    | 2.81(2)   | O(5)-K(1)-O(16A)       | 88.9(9)   |
| K(1)-O(16A)#1  | 2.81(4)   | O(13)-K(1)-O(16A)      | 47.6(8)   |
| K(1)-O(5)      | 2.81(2)   | O(4)#7-K(1)-O(16A)     | 84.4(8)   |
| K(1)-O(13)     | 2.84(2)   | O(9)#6-K(1)-O(16A)     | 118.7(9)  |
| K(1)-O(4)#7    | 2.88(2)   | O(14)#1-K(1)-O(16A)    | 112.3(8)  |
| K(1)-O(9)#6    | 2.93(2)   | O(16B)#1-K(1)-O(16A)   | 93.8(12)  |
| K(1)-O(14)#1   | 3.02(2)   | O(16B)#8-K(1)-O(16A)   | 48.5(11)  |
| K(1)-O(16B)#1  | 3.03(4)   | O(3)#6-K(1)-O(15B)#8   | 104.6(9)  |
| K(1)-O(16B)#8  | 3.05(5)   | O(16A)#1-K(1)-O(15B)#8 | 79.8(11)  |
| K(1)-O(16A)    | 3.08(4)   | O(5)-K(1)-O(15B)#8     | 153.9(9)  |
| K(1)-O(15B)#8  | 3.31(5)   | O(13)-K(1)-O(15B)#8    | 92.8(9)   |
| K(2)-O(2)#9    | 2.693(19) | O(4)#7-K(1)-O(15B)#8   | 59.5(9)   |
| K(2)-O(6)      | 2.73(2)   | O(9)#6-K(1)-O(15B)#8   | 53.6(9)   |
| K(2)-O(7)      | 2.85(2)   | O(14)#1-K(1)-O(15B)#8  | 124.4(9)  |
| K(2)-O(2)#10   | 2.945(19) | O(16B)#1-K(1)-O(15B)#8 | 74.5(11)  |
| K(2)-O(1)#1    | 2.974(19) | O(16B)#8-K(1)-O(15B)#8 | 30.9(10)  |
| K(2)-O(11)#7   | 3.04(2)   | O(16A)-K(1)-O(15B)#8   | 65.1(11)  |
| K(2)-O(12)#1   | 3.05(2)   | O(2)#9-K(2)-O(6)       | 127.2(7)  |
| K(2)-O(8)#10   | 3.06(2)   | O(2)#9-K(2)-O(7)       | 123.4(6)  |
| K(2)-O(1)      | 3.36(2)   | O(6)-K(2)-O(7)         | 82.8(7)   |
| Li(1)-O(3)#7   | 1.86(5)   | O(2)#9-K(2)-O(2)#10    | 122.7(7)  |
| Li(1)-O(12)    | 1.88(5)   | O(6)-K(2)-O(2)#10      | 101.4(6)  |
| Li(1)-O(7)#3   | 1.93(5)   | O(7)-K(2)-O(2)#10      | 87.0(6)   |
| Li(1)-O(11)#11 | 1.98(5)   | O(2)#9-K(2)-O(1)#1     | 70.8(5)   |
| Li(2)-O(16A)#5 | 1.69(6)   | O(6)-K(2)-O(1)#1       | 73.1(6)   |
| Li(2)-O(13)#12 | 1.91(6)   | O(7)-K(2)-O(1)#1       | 76.8(6)   |
| Li(2)-O(16B)#2 | 1.93(7)   | O(2)#10-K(2)-O(1)#1    | 163.4(6)  |
| Li(2)-O(9)     | 1.95(5)   | O(2)#9-K(2)-O(11)#7    | 84.7(6)   |
| Li(2)-O(15B)#2 | 2.19(7)   | O(6)-K(2)-O(11)#7      | 144.2(7)  |

|                         |           |                         |          |
|-------------------------|-----------|-------------------------|----------|
| Li(2)-O(16B)#5          | 2.20(6)   | O(7)-K(2)-O(11)#7       | 64.1(5)  |
| Li(2)-O(15A)#2          | 2.63(7)   | O(2)#10-K(2)-O(11)#7    | 65.5(5)  |
| Li(2)-P(4)#12           | 2.97(6)   | O(1)#1-K(2)-O(11)#7     | 109.5(6) |
| Li(3)-O(7)#3            | 1.88(5)   | O(2)#9-K(2)-O(12)#1     | 63.7(6)  |
| Li(3)-O(5)              | 1.91(6)   | O(6)-K(2)-O(12)#1       | 114.9(6) |
| Li(3)-O(14)             | 1.95(5)   | O(7)-K(2)-O(12)#1       | 59.9(5)  |
| Li(3)-O(10)             | 1.95(5)   | O(2)#10-K(2)-O(12)#1    | 124.9(6) |
| Li(4)-O(2)#13           | 1.89(5)   | O(1)#1-K(2)-O(12)#1     | 49.1(5)  |
| Li(4)-O(12)#5           | 1.92(5)   | O(11)#7-K(2)-O(12)#1    | 60.7(5)  |
| Li(4)-O(11)             | 1.98(6)   | O(2)#9-K(2)-O(8)#10     | 79.9(6)  |
| Li(4)-O(8)#3            | 2.04(5)   | O(6)-K(2)-O(8)#10       | 117.1(6) |
| P(1)-O(11)              | 1.48(2)   | O(7)-K(2)-O(8)#10       | 132.9(6) |
| P(1)-O(2)               | 1.53(2)   | O(2)#10-K(2)-O(8)#10    | 48.9(5)  |
| P(1)-O(8)               | 1.54(2)   | O(1)#1-K(2)-O(8)#10     | 147.6(6) |
| P(1)-O(6)               | 1.58(2)   | O(11)#7-K(2)-O(8)#10    | 80.4(5)  |
| P(2)-O(3)               | 1.52(2)   | O(12)#1-K(2)-O(8)#10    | 127.5(5) |
| P(2)-O(9)               | 1.56(3)   | O(2)#9-K(2)-O(1)        | 169.8(6) |
| P(2)-O(4)               | 1.56(2)   | O(6)-K(2)-O(1)          | 55.3(6)  |
| P(2)-O(10)              | 1.57(2)   | O(7)-K(2)-O(1)          | 46.5(5)  |
| P(3)-O(7)               | 1.49(2)   | O(2)#10-K(2)-O(1)       | 62.6(5)  |
| P(3)-O(12)              | 1.536(19) | O(1)#1-K(2)-O(1)        | 102.6(6) |
| P(3)-O(5)               | 1.55(2)   | O(11)#7-K(2)-O(1)       | 90.4(5)  |
| P(3)-O(1)               | 1.58(2)   | O(12)#1-K(2)-O(1)       | 106.0(5) |
| P(4)-O(15B)             | 1.44(4)   | O(8)#10-K(2)-O(1)       | 108.2(5) |
| P(4)-O(14)              | 1.50(3)   | O(3)#7-Li(1)-O(12)      | 123(3)   |
| P(4)-O(13)              | 1.51(2)   | O(3)#7-Li(1)-O(7)#3     | 112(2)   |
| P(4)-O(16B)             | 1.51(4)   | O(12)-Li(1)-O(7)#3      | 102(2)   |
| P(4)-O(16A)             | 1.63(4)   | O(3)#7-Li(1)-O(11)#11   | 106(2)   |
| P(4)-O(15A)             | 1.73(4)   | O(12)-Li(1)-O(11)#11    | 106(2)   |
| O(14)#1-Bi(1)-O(4)      | 138.7(8)  | O(7)#3-Li(1)-O(11)#11   | 107(2)   |
| O(14)#1-Bi(1)-O(15B)#2  | 134.6(11) | O(16A)#5-Li(2)-O(13)#12 | 124(3)   |
| O(4)-Bi(1)-O(15B)#2     | 79.6(12)  | O(16A)#5-Li(2)-O(16B)#2 | 88(3)    |
| O(14)#1-Bi(1)-O(13)     | 83.1(8)   | O(13)#12-Li(2)-O(16B)#2 | 108(3)   |
| O(4)-Bi(1)-O(13)        | 121.8(7)  | O(16A)#5-Li(2)-O(9)     | 99(3)    |
| O(15B)#2-Bi(1)-O(13)    | 95.2(13)  | O(13)#12-Li(2)-O(9)     | 100(3)   |
| O(14)#1-Bi(1)-O(15A)#2  | 123.5(12) | O(16B)#2-Li(2)-O(9)     | 140(3)   |
| O(4)-Bi(1)-O(15A)#2     | 97.0(11)  | O(16A)#5-Li(2)-O(15B)#2 | 125(4)   |
| O(15B)#2-Bi(1)-O(15A)#2 | 25.4(14)  | O(13)#12-Li(2)-O(15B)#2 | 104(3)   |
| O(13)-Bi(1)-O(15A)#2    | 70.3(12)  | O(16B)#2-Li(2)-O(15B)#2 | 49(2)    |
| O(14)#1-Bi(1)-O(9)#1    | 89.0(8)   | O(9)-Li(2)-O(15B)#2     | 98(2)    |
| O(4)-Bi(1)-O(9)#1       | 81.6(7)   | O(16A)#5-Li(2)-O(16B)#5 | 29.2(19) |
| O(15B)#2-Bi(1)-O(9)#1   | 70.9(13)  | O(13)#12-Li(2)-O(16B)#5 | 96(3)    |
| O(13)-Bi(1)-O(9)#1      | 151.1(8)  | O(16B)#2-Li(2)-O(16B)#5 | 91(2)    |
| O(15A)#2-Bi(1)-O(9)#1   | 91.6(11)  | O(9)-Li(2)-O(16B)#5     | 114(3)   |

|                         |           |                         |           |
|-------------------------|-----------|-------------------------|-----------|
| O(14)#1-Bi(1)-O(5)      | 77.6(7)   | O(15B)#2-Li(2)-O(16B)#5 | 139(3)    |
| O(4)-Bi(1)-O(5)         | 77.2(7)   | O(16A)#5-Li(2)-O(15A)#2 | 148(4)    |
| O(15B)#2-Bi(1)-O(5)     | 146.4(11) | O(13)#12-Li(2)-O(15A)#2 | 82(2)     |
| O(13)-Bi(1)-O(5)        | 77.2(7)   | O(16B)#2-Li(2)-O(15A)#2 | 64(2)     |
| O(15A)#2-Bi(1)-O(5)     | 137.3(11) | O(9)-Li(2)-O(15A)#2     | 93(2)     |
| O(9)#1-Bi(1)-O(5)       | 128.2(7)  | O(15B)#2-Li(2)-O(15A)#2 | 23.5(17)  |
| O(14)#1-Bi(1)-O(15A)#1  | 55.1(10)  | O(16B)#5-Li(2)-O(15A)#2 | 152(3)    |
| O(4)-Bi(1)-O(15A)#1     | 155.1(11) | O(7)#3-Li(3)-O(5)       | 121(2)    |
| O(15B)#2-Bi(1)-O(15A)#1 | 80.5(14)  | O(7)#3-Li(3)-O(14)      | 114(3)    |
| O(13)-Bi(1)-O(15A)#1    | 74.9(11)  | O(5)-Li(3)-O(14)        | 105(2)    |
| O(15A)#2-Bi(1)-O(15A)#1 | 69.9(8)   | O(7)#3-Li(3)-O(10)      | 95(2)     |
| O(9)#1-Bi(1)-O(15A)#1   | 77.8(11)  | O(5)-Li(3)-O(10)        | 123(3)    |
| O(5)-Bi(1)-O(15A)#1     | 127.0(10) | O(14)-Li(3)-O(10)       | 97(2)     |
| O(14)#1-Bi(1)-O(10)#1   | 70.7(8)   | O(2)#13-Li(4)-O(12)#5   | 106(2)    |
| O(4)-Bi(1)-O(10)#1      | 70.5(7)   | O(2)#13-Li(4)-O(11)     | 114(3)    |
| O(15B)#2-Bi(1)-O(10)#1  | 122.4(13) | O(12)#5-Li(4)-O(11)     | 112(3)    |
| O(13)-Bi(1)-O(10)#1     | 142.4(7)  | O(2)#13-Li(4)-O(8)#3    | 122(3)    |
| O(15A)#2-Bi(1)-O(10)#1  | 147.0(11) | O(12)#5-Li(4)-O(8)#3    | 104(2)    |
| O(9)#1-Bi(1)-O(10)#1    | 57.1(7)   | O(11)-Li(4)-O(8)#3      | 98(2)     |
| O(5)-Bi(1)-O(10)#1      | 71.2(6)   | O(11)-P(1)-O(2)         | 114.1(11) |
| O(15A)#1-Bi(1)-O(10)#1  | 108.7(10) | O(11)-P(1)-O(8)         | 110.6(11) |
| O(6)-Bi(2)-O(1)         | 85.2(7)   | O(2)-P(1)-O(8)          | 108.4(12) |
| O(6)-Bi(2)-O(8)#3       | 87.2(8)   | O(11)-P(1)-O(6)         | 105.8(12) |
| O(1)-Bi(2)-O(8)#3       | 93.9(7)   | O(2)-P(1)-O(6)          | 109.5(11) |
| O(6)-Bi(2)-O(10)#1      | 89.0(8)   | O(8)-P(1)-O(6)          | 108.2(12) |
| O(1)-Bi(2)-O(10)#1      | 86.4(7)   | O(3)-P(2)-O(9)          | 113.3(12) |
| O(8)#3-Bi(2)-O(10)#1    | 176.1(8)  | O(3)-P(2)-O(4)          | 111.5(12) |
| O(3)#6-K(1)-O(16A)#1    | 76.7(9)   | O(9)-P(2)-O(4)          | 109.1(14) |
| O(3)#6-K(1)-O(5)        | 101.0(6)  | O(3)-P(2)-O(10)         | 108.8(12) |
| O(16A)#1-K(1)-O(5)      | 111.2(9)  | O(9)-P(2)-O(10)         | 104.9(13) |
| O(3)#6-K(1)-O(13)       | 150.7(7)  | O(4)-P(2)-O(10)         | 109.1(13) |
| O(16A)#1-K(1)-O(13)     | 83.6(9)   | O(7)-P(3)-O(12)         | 112.5(11) |
| O(5)-K(1)-O(13)         | 66.2(6)   | O(7)-P(3)-O(5)          | 110.3(12) |
| O(3)#6-K(1)-O(4)#7      | 77.4(6)   | O(12)-P(3)-O(5)         | 110.9(11) |
| O(16A)#1-K(1)-O(4)#7    | 123.1(9)  | O(7)-P(3)-O(1)          | 108.7(11) |
| O(5)-K(1)-O(4)#7        | 123.0(7)  | O(12)-P(3)-O(1)         | 106.9(11) |
| O(13)-K(1)-O(4)#7       | 131.9(7)  | O(5)-P(3)-O(1)          | 107.4(10) |
| O(3)#6-K(1)-O(9)#6      | 53.2(6)   | O(15B)-P(4)-O(14)       | 122(2)    |
| O(16A)#1-K(1)-O(9)#6    | 57.7(9)   | O(15B)-P(4)-O(13)       | 109(2)    |
| O(5)-K(1)-O(9)#6        | 152.3(7)  | O(14)-P(4)-O(13)        | 111.6(15) |
| O(13)-K(1)-O(9)#6       | 130.3(7)  | O(15B)-P(4)-O(16B)      | 71(2)     |
| O(4)#7-K(1)-O(9)#6      | 66.1(6)   | O(14)-P(4)-O(16B)       | 115.6(19) |
| O(3)#6-K(1)-O(14)#1     | 86.0(6)   | O(13)-P(4)-O(16B)       | 122(2)    |
| O(16A)#1-K(1)-O(14)#1   | 49.2(9)   | O(15B)-P(4)-O(16A)      | 110(2)    |

|                        |          |                    |           |
|------------------------|----------|--------------------|-----------|
| O(5)-K(1)-O(14)#1      | 62.0(6)  | O(14)-P(4)-O(16A)  | 101.9(18) |
| O(13)-K(1)-O(14)#1     | 64.7(6)  | O(13)-P(4)-O(16A)  | 99.3(17)  |
| O(4)#7-K(1)-O(14)#1    | 163.2(7) | O(16B)-P(4)-O(16A) | 40.5(19)  |
| O(9)#6-K(1)-O(14)#1    | 102.2(7) | O(15B)-P(4)-O(15A) | 38(2)     |
| O(3)#6-K(1)-O(16B)#1   | 97.8(9)  | O(14)-P(4)-O(15A)  | 88.2(19)  |
| O(16A)#1-K(1)-O(16B)#1 | 21.1(10) | O(13)-P(4)-O(15A)  | 112.2(18) |
| O(5)-K(1)-O(16B)#1     | 106.9(9) | O(16B)-P(4)-O(15A) | 101(2)    |
| O(13)-K(1)-O(16B)#1    | 63.9(9)  | O(16A)-P(4)-O(15A) | 141(2)    |

#1  $x, y-1, z$     #2  $-x+1, y-1/2, -z+1$     #3  $x, y+1, z$   
 #4  $x+1, y-1, z$     #5  $x+1, y, z$     #6  $x-1, y-1, z$   
 #7  $x-1, y, z$     #8  $-x, y-1/2, -z+1$     #9  $-x+1, y-1/2, -z+2$   
 #10  $-x+1, y+1/2, -z+2$     #11  $x-1, y+1, z$   
 #12  $-x+1, y+1/2, -z+1$     #13  $-x+2, y+1/2, -z+2$   
 #14  $x+1, y+1, z$     #15  $-x+2, y-1/2, -z+2$   
 #16  $-x, y+1/2, -z+1$



**Table S3b.** Selected distances (Å) and angles (deg) for Li<sub>2</sub>RbBi(PO<sub>4</sub>)<sub>2</sub>.

|                |         |                        |           |
|----------------|---------|------------------------|-----------|
| Bi(1)-O(10)#1  | 2.15(2) | O(6)-Rb(1)-O(10)#5     | 73.6(6)   |
| Bi(1)-O(8)     | 2.13(3) | O(8)#10-Rb(1)-O(10)#5  | 72.9(7)   |
| Bi(1)-O(4)#2   | 2.33(2) | O(1)#11-Rb(1)-O(10)#5  | 75.9(6)   |
| Bi(1)-O(5)#3   | 2.35(2) | O(9)#5-Rb(1)-O(10)#5   | 47.5(6)   |
| Bi(1)-O(11)#4  | 2.67(2) | O(6)-Rb(1)-O(7)#5      | 83.3(6)   |
| Bi(2)-O(11)#7  | 2.34(2) | O(8)#10-Rb(1)-O(7)#5   | 141.3(7)  |
| Bi(2)-O(11)    | 2.34(2) | O(1)#11-Rb(1)-O(7)#5   | 60.5(6)   |
| Bi(2)-O(3)#8   | 2.37(2) | O(9)#5-Rb(1)-O(7)#5    | 60.2(6)   |
| Bi(2)-O(3)#9   | 2.37(2) | O(10)#5-Rb(1)-O(7)#5   | 107.1(6)  |
| Bi(2)-O(12)#7  | 2.44(2) | O(6)-Rb(1)-O(6)#2      | 117.6(7)  |
| Bi(2)-O(12)    | 2.44(2) | O(8)#10-Rb(1)-O(6)#2   | 104.5(7)  |
| Bi(2)-O(5)#8   | 2.64(2) | O(1)#11-Rb(1)-O(6)#2   | 86.8(6)   |
| Bi(2)-O(5)#9   | 2.64(2) | O(9)#5-Rb(1)-O(6)#2    | 123.2(6)  |
| Rb(1)-O(6)     | 2.77(2) | O(10)#5-Rb(1)-O(6)#2   | 162.6(6)  |
| Rb(1)-O(8)#10  | 2.85(3) | O(7)#5-Rb(1)-O(6)#2    | 63.7(6)   |
| Rb(1)-O(1)#11  | 2.98(2) | O(6)-Rb(1)-O(4)#2      | 78.3(6)   |
| Rb(1)-O(9)#5   | 3.07(2) | O(8)#10-Rb(1)-O(4)#2   | 118.2(6)  |
| Rb(1)-O(10)#5  | 3.06(2) | O(1)#11-Rb(1)-O(4)#2   | 132.0(6)  |
| Rb(1)-O(7)#5   | 3.07(2) | O(9)#5-Rb(1)-O(4)#2    | 128.1(6)  |
| Rb(1)-O(6)#2   | 3.06(2) | O(10)#5-Rb(1)-O(4)#2   | 148.8(6)  |
| Rb(1)-O(4)#2   | 3.15(2) | O(7)#5-Rb(1)-O(4)#2    | 82.4(6)   |
| Rb(1)-O(10)#11 | 3.41(2) | O(6)#2-Rb(1)-O(4)#2    | 47.8(6)   |
| Rb(1)-O(8)     | 3.56(3) | O(6)-Rb(1)-O(10)#11    | 167.5(6)  |
| Rb(2)-O(3)#3   | 3.01(2) | O(8)#10-Rb(1)-O(10)#11 | 55.4(7)   |
| Rb(2)-O(3)     | 3.01(2) | O(1)#11-Rb(1)-O(10)#11 | 45.7(6)   |
| Rb(2)-O(11)#2  | 3.04(2) | O(9)#5-Rb(1)-O(10)#11  | 104.1(6)  |
| Rb(2)-O(11)#4  | 3.04(2) | O(10)#5-Rb(1)-O(10)#11 | 100.8(6)  |
| Rb(2)-O(2)#3   | 3.05(3) | O(7)#5-Rb(1)-O(10)#11  | 87.8(6)   |
| Rb(2)-O(2)     | 3.05(3) | O(6)#2-Rb(1)-O(10)#11  | 65.3(6)   |
| Rb(2)-O(12)#2  | 3.20(2) | O(4)#2-Rb(1)-O(10)#11  | 109.3(6)  |
| Rb(2)-O(12)#4  | 3.20(2) | O(6)-Rb(1)-O(8)        | 43.2(6)   |
| Li(1)-O(7)#12  | 1.84(8) | O(8)#10-Rb(1)-O(8)     | 105.8(5)  |
| Li(1)-O(6)     | 1.95(6) | O(1)#11-Rb(1)-O(8)     | 165.0(6)  |
| Li(1)-O(9)#5   | 1.98(7) | O(9)#5-Rb(1)-O(8)      | 105.9(6)  |
| Li(1)-O(4)#5   | 2.04(7) | O(10)#5-Rb(1)-O(8)     | 94.9(6)   |
| Li(2)-O(1)#2   | 1.72(6) | O(7)#5-Rb(1)-O(8)      | 112.6(6)  |
| Li(2)-O(3)     | 1.82(6) | O(6)#2-Rb(1)-O(8)      | 102.3(6)  |
| Li(2)-O(12)    | 1.99(7) | O(4)#2-Rb(1)-O(8)      | 54.6(6)   |
| Li(2)-O(5)#7   | 2.11(6) | Li(3)#5-Rb(1)-O(8)     | 133.1(12) |
| Li(3)-O(1)#2   | 1.81(6) | Li(1)#2-Rb(1)-O(8)     | 122.5(11) |
| Li(3)-O(9)     | 1.95(7) | O(10)#11-Rb(1)-O(8)    | 149.3(6)  |
| Li(3)-O(2)#3   | 1.96(6) | O(3)#3-Rb(2)-O(3)      | 103.5(9)  |

|                       |           |                       |           |
|-----------------------|-----------|-----------------------|-----------|
| Li(3)-O(7)            | 1.98(6)   | O(3)#3-Rb(2)-O(11)#2  | 146.9(6)  |
| P(1)-O(2)             | 1.46(3)   | O(3)-Rb(2)-O(11)#2    | 65.0(6)   |
| P(1)-O(3)             | 1.54(2)   | O(3)#3-Rb(2)-O(11)#4  | 65.0(6)   |
| P(1)-O(5)             | 1.54(2)   | O(3)-Rb(2)-O(11)#4    | 146.9(6)  |
| P(1)-O(11)            | 1.59(3)   | O(11)#2-Rb(2)-O(11)#4 | 140.8(10) |
| P(2)-O(6)             | 1.48(2)   | O(3)#3-Rb(2)-O(2)#3   | 49.0(7)   |
| P(2)-O(7)             | 1.52(2)   | O(3)-Rb(2)-O(2)#3     | 80.0(6)   |
| P(2)-O(8)             | 1.53(3)   | O(11)#2-Rb(2)-O(2)#3  | 143.6(7)  |
| P(2)-O(4)             | 1.55(3)   | O(11)#4-Rb(2)-O(2)#3  | 69.2(7)   |
| P(3)-O(1)             | 1.49(3)   | O(3)#3-Rb(2)-O(2)     | 80.0(6)   |
| P(3)-O(9)             | 1.53(3)   | O(3)-Rb(2)-O(2)       | 49.0(7)   |
| P(3)-O(12)            | 1.56(2)   | O(11)#2-Rb(2)-O(2)    | 69.2(7)   |
| P(3)-O(10)            | 1.57(2)   | O(11)#4-Rb(2)-O(2)    | 143.6(7)  |
| O(10)#1-Bi(1)-O(8)    | 87.2(9)   | O(2)#3-Rb(2)-O(2)     | 95.8(10)  |
| O(10)#1-Bi(1)-O(4)#2  | 94.5(8)   | O(3)#3-Rb(2)-O(12)#2  | 141.4(6)  |
| O(8)-Bi(1)-O(4)#2     | 88.0(9)   | O(3)-Rb(2)-O(12)#2    | 58.8(6)   |
| O(10)#1-Bi(1)-O(5)#3  | 87.4(8)   | O(11)#2-Rb(2)-O(12)#2 | 61.3(6)   |
| O(8)-Bi(1)-O(5)#3     | 90.3(9)   | O(11)#4-Rb(2)-O(12)#2 | 109.7(6)  |
| O(4)#2-Bi(1)-O(5)#3   | 177.4(9)  | O(2)#3-Rb(2)-O(12)#2  | 92.6(6)   |
| O(10)#1-Bi(1)-O(11)#4 | 91.5(8)   | O(2)-Rb(2)-O(12)#2    | 103.8(6)  |
| O(8)-Bi(1)-O(11)#4    | 161.8(9)  | O(3)#3-Rb(2)-O(12)#4  | 58.8(6)   |
| O(4)#2-Bi(1)-O(11)#4  | 110.2(8)  | O(3)-Rb(2)-O(12)#4    | 141.4(6)  |
| O(5)#3-Bi(1)-O(11)#4  | 71.5(8)   | O(11)#2-Rb(2)-O(12)#4 | 109.7(6)  |
| O(11)#7-Bi(2)-O(11)   | 120.0(12) | O(11)#4-Rb(2)-O(12)#4 | 61.3(6)   |
| O(11)#7-Bi(2)-O(3)#8  | 140.4(8)  | O(2)#3-Rb(2)-O(12)#4  | 103.8(6)  |
| O(11)-Bi(2)-O(3)#8    | 87.3(8)   | O(2)-Rb(2)-O(12)#4    | 92.6(6)   |
| O(11)#7-Bi(2)-O(3)#9  | 87.3(8)   | O(12)#2-Rb(2)-O(12)#4 | 155.4(9)  |
| O(11)-Bi(2)-O(3)#9    | 140.4(8)  | O(7)#12-Li(1)-O(6)    | 117(4)    |
| O(3)#8-Bi(2)-O(3)#9   | 87.4(11)  | O(7)#12-Li(1)-O(9)#5  | 114(3)    |
| O(11)#7-Bi(2)-O(12)#7 | 83.6(8)   | O(6)-Li(1)-O(9)#5     | 104(3)    |
| O(11)-Bi(2)-O(12)#7   | 76.7(8)   | O(7)#12-Li(1)-O(4)#5  | 105(3)    |
| O(3)#8-Bi(2)-O(12)#7  | 133.5(7)  | O(6)-Li(1)-O(4)#5     | 115(3)    |
| O(3)#9-Bi(2)-O(12)#7  | 78.7(7)   | O(9)#5-Li(1)-O(4)#5   | 101(3)    |
| O(11)#7-Bi(2)-O(12)   | 76.7(8)   | O(1)#2-Li(2)-O(3)     | 121(3)    |
| O(11)-Bi(2)-O(12)     | 83.6(8)   | O(1)#2-Li(2)-O(12)    | 125(3)    |
| O(3)#8-Bi(2)-O(12)    | 78.8(7)   | O(3)-Li(2)-O(12)      | 103(3)    |
| O(3)#9-Bi(2)-O(12)    | 133.5(7)  | O(1)#2-Li(2)-O(5)#7   | 99(3)     |
| O(12)#7-Bi(2)-O(12)   | 140.1(11) | O(3)-Li(2)-O(5)#7     | 97(3)     |
| O(11)#7-Bi(2)-O(5)#8  | 153.1(7)  | O(12)-Li(2)-O(5)#7    | 108(3)    |
| O(11)-Bi(2)-O(5)#8    | 72.1(8)   | O(2)-P(1)-O(3)        | 113.9(14) |
| O(3)#8-Bi(2)-O(5)#8   | 57.6(7)   | O(2)-P(1)-O(5)        | 107.2(14) |
| O(3)#9-Bi(2)-O(5)#8   | 72.0(7)   | O(3)-P(1)-O(5)        | 103.9(13) |
| O(12)#7-Bi(2)-O(5)#8  | 75.9(7)   | O(2)-P(1)-O(11)       | 111.0(15) |
| O(12)-Bi(2)-O(5)#8    | 130.0(7)  | O(3)-P(1)-O(11)       | 111.7(13) |

|                       |           |                  |           |
|-----------------------|-----------|------------------|-----------|
| O(11)#7-Bi(2)-O(5)#9  | 72.1(8)   | O(5)-P(1)-O(11)  | 108.7(15) |
| O(11)-Bi(2)-O(5)#9    | 153.1(7)  | O(6)-P(2)-O(7)   | 113.9(13) |
| O(3)#8-Bi(2)-O(5)#9   | 72.0(7)   | O(6)-P(2)-O(8)   | 108.2(13) |
| O(3)#9-Bi(2)-O(5)#9   | 57.6(7)   | O(7)-P(2)-O(8)   | 104.9(14) |
| O(12)#7-Bi(2)-O(5)#9  | 130.0(7)  | O(6)-P(2)-O(4)   | 112.1(14) |
| O(12)-Bi(2)-O(5)#9    | 75.9(7)   | O(7)-P(2)-O(4)   | 110.3(13) |
| O(5)#8-Bi(2)-O(5)#9   | 108.4(10) | O(8)-P(2)-O(4)   | 106.9(14) |
| O(6)-Rb(1)-O(8)#10    | 130.6(7)  | O(1)-P(3)-O(9)   | 111.5(15) |
| O(6)-Rb(1)-O(1)#11    | 121.9(7)  | O(1)-P(3)-O(12)  | 112.4(14) |
| O(8)#10-Rb(1)-O(1)#11 | 83.1(7)   | O(9)-P(3)-O(12)  | 112.4(13) |
| O(6)-Rb(1)-O(9)#5     | 63.8(6)   | O(1)-P(3)-O(10)  | 110.3(15) |
| O(8)#10-Rb(1)-O(9)#5  | 113.4(7)  | O(9)-P(3)-O(10)  | 105.6(13) |
| O(1)#11-Rb(1)-O(9)#5  | 59.1(7)   | O(12)-P(3)-O(10) | 104.2(12) |

- #1  $x, y+1, z-1$     #2  $x, y+1, z$     #3  $-x+1, y, -z+1$   
 #4  $-x+1, y+1, -z+1$     #5  $-x+3/2, y+1/2, -z+1$   
 #6  $-x+3/2, y-1/2, -z$     #7  $-x+1, y, -z+2$   
 #8  $x, y-1, z$     #9  $-x+1, y-1, -z+2$     #10  $-x+3/2, y+1/2, -z$   
 #11  $-x+3/2, y+3/2, -z+1$     #12  $-x+3/2, y-1/2, -z+1$   
 #13  $-x+3/2, y-3/2, -z+1$     #14  $x, y-1, z+1$   
 #15  $-x+1, y-1, -z+1$

**Table S3c.** Selected distances (Å) and angles (deg) for Li<sub>2</sub>CsBi(PO<sub>4</sub>)<sub>2</sub>.

|                |           |                      |          |
|----------------|-----------|----------------------|----------|
| Cs(1)-O(6)#1   | 2.94(2)   | O(1)#7-Cs(2)-O(1)    | 142.6(8) |
| Cs(1)-O(3)     | 2.973(19) | O(10)#6-Cs(2)-O(4)#3 | 79.2(5)  |
| Cs(1)-O(6)#2   | 3.14(2)   | O(10)#3-Cs(2)-O(4)#3 | 47.0(5)  |
| Cs(1)-O(11)#3  | 3.186(19) | O(1)#7-Cs(2)-O(4)#3  | 141.4(5) |
| Cs(1)-O(8)     | 3.21(2)   | O(1)-Cs(2)-O(4)#3    | 70.1(6)  |
| Cs(1)-O(5)#4   | 3.23(2)   | O(10)#6-Cs(2)-O(4)#6 | 47.0(5)  |
| Cs(1)-O(12)#2  | 3.29(2)   | O(10)#3-Cs(2)-O(4)#6 | 79.2(5)  |
| Cs(1)-O(7)#3   | 3.30(2)   | O(1)#7-Cs(2)-O(4)#6  | 70.1(6)  |
| Cs(1)-O(7)     | 3.43(2)   | O(1)-Cs(2)-O(4)#6    | 141.4(5) |
| Cs(1)-O(3)#1   | 3.501(19) | O(4)#3-Cs(2)-O(4)#6  | 93.1(7)  |
| Cs(2)-O(10)#6  | 3.14(2)   | O(10)#6-Cs(2)-O(9)#8 | 138.8(5) |
| Cs(2)-O(10)#3  | 3.14(2)   | O(10)#3-Cs(2)-O(9)#8 | 58.4(5)  |
| Cs(2)-O(1)#7   | 3.14(2)   | O(1)#7-Cs(2)-O(9)#8  | 112.7(5) |
| Cs(2)-O(1)     | 3.14(2)   | O(1)-Cs(2)-O(9)#8    | 59.9(5)  |
| Cs(2)-O(4)#3   | 3.25(2)   | O(4)#3-Cs(2)-O(9)#8  | 102.1(5) |
| Cs(2)-O(4)#6   | 3.25(2)   | O(4)#6-Cs(2)-O(9)#8  | 92.2(5)  |
| Cs(2)-O(9)#8   | 3.244(19) | O(10)#6-Cs(2)-O(9)#9 | 58.4(5)  |
| Cs(2)-O(9)#9   | 3.244(19) | O(10)#3-Cs(2)-O(9)#9 | 138.8(5) |
| Cs(2)-O(4)     | 3.70(2)   | O(1)#7-Cs(2)-O(9)#9  | 59.9(5)  |
| Cs(2)-O(4)#7   | 3.70(2)   | O(1)-Cs(2)-O(9)#9    | 112.7(5) |
| Bi(1)-O(3)     | 2.123(19) | O(4)#3-Cs(2)-O(9)#9  | 92.2(5)  |
| Bi(1)-O(7)     | 2.149(19) | O(4)#6-Cs(2)-O(9)#9  | 102.1(5) |
| Bi(1)-O(12)#10 | 2.36(2)   | O(9)#8-Cs(2)-O(9)#9  | 159.2(7) |
| Bi(1)-O(2)#3   | 2.41(2)   | O(10)#6-Cs(2)-O(4)   | 134.8(5) |
| Bi(1)-O(1)     | 2.75(2)   | O(10)#3-Cs(2)-O(4)   | 105.7(5) |
| Bi(2)-O(1)#8   | 2.34(2)   | O(1)#7-Cs(2)-O(4)    | 104.2(5) |
| Bi(2)-O(1)     | 2.34(2)   | O(1)-Cs(2)-O(4)      | 42.3(5)  |
| Bi(2)-O(10)#3  | 2.423(19) | O(4)#3-Cs(2)-O(4)    | 93.9(5)  |
| Bi(2)-O(10)#12 | 2.423(19) | O(4)#6-Cs(2)-O(4)    | 173.0(5) |
| Bi(2)-O(9)     | 2.485(19) | O(9)#8-Cs(2)-O(4)    | 86.4(5)  |
| Bi(2)-O(9)#8   | 2.486(19) | O(9)#9-Cs(2)-O(4)    | 77.6(5)  |
| Bi(2)-O(2)#3   | 2.68(2)   | O(10)#6-Cs(2)-O(4)#7 | 105.7(5) |
| Bi(2)-O(2)#12  | 2.68(2)   | O(10)#3-Cs(2)-O(4)#7 | 134.8(5) |
| Li(1)-O(4)     | 1.87(5)   | O(1)#7-Cs(2)-O(4)#7  | 42.3(5)  |
| Li(1)-O(11)#9  | 1.96(6)   | O(1)-Cs(2)-O(4)#7    | 104.2(5) |
| Li(1)-O(8)#13  | 2.01(5)   | O(4)#3-Cs(2)-O(4)#7  | 173.0(5) |
| Li(1)-O(5)#10  | 2.04(6)   | O(4)#6-Cs(2)-O(4)#7  | 93.9(5)  |
| Li(2)-O(8)     | 1.88(6)   | O(9)#8-Cs(2)-O(4)#7  | 77.6(5)  |
| Li(2)-O(10)#12 | 1.92(6)   | O(9)#9-Cs(2)-O(4)#7  | 86.4(5)  |
| Li(2)-O(2)#3   | 1.95(6)   | O(4)-Cs(2)-O(4)#7    | 79.1(6)  |
| Li(2)-O(9)#3   | 1.96(7)   | O(3)-Bi(1)-O(7)      | 84.2(7)  |
| Li(3)-O(6)     | 1.84(5)   | O(3)-Bi(1)-O(12)#10  | 89.3(7)  |

|                       |           |                        |           |
|-----------------------|-----------|------------------------|-----------|
| Li(3)-O(12)#11        | 1.99(5)   | O(7)-Bi(1)-O(12)#10    | 97.9(8)   |
| Li(3)-O(11)#1         | 2.05(5)   | O(3)-Bi(1)-O(2)#3      | 90.0(7)   |
| Li(3)-O(5)#15         | 2.05(6)   | O(7)-Bi(1)-O(2)#3      | 84.4(7)   |
| P(1)-O(4)             | 1.51(2)   | O(12)#10-Bi(1)-O(2)#3  | 177.5(7)  |
| P(1)-O(10)            | 1.54(2)   | O(3)-Bi(1)-O(1)        | 163.5(7)  |
| P(1)-O(2)             | 1.56(2)   | O(7)-Bi(1)-O(1)        | 93.2(7)   |
| P(1)-O(1)             | 1.57(2)   | O(12)#10-Bi(1)-O(1)    | 107.2(7)  |
| P(2)-O(6)             | 1.49(2)   | O(2)#3-Bi(1)-O(1)      | 73.5(6)   |
| P(2)-O(5)             | 1.54(2)   | O(1)#8-Bi(2)-O(1)      | 115.7(11) |
| P(2)-O(12)            | 1.55(2)   | O(1)#8-Bi(2)-O(10)#3   | 142.9(7)  |
| P(2)-O(3)             | 1.596(19) | O(1)-Bi(2)-O(10)#3     | 88.3(7)   |
| P(3)-O(8)             | 1.50(2)   | O(1)#8-Bi(2)-O(10)#12  | 88.3(7)   |
| P(3)-O(11)            | 1.53(2)   | O(1)-Bi(2)-O(10)#12    | 142.9(7)  |
| P(3)-O(7)             | 1.55(2)   | O(10)#3-Bi(2)-O(10)#12 | 87.8(9)   |
| P(3)-O(9)             | 1.55(2)   | O(1)#8-Bi(2)-O(9)      | 82.6(7)   |
| O(6)#1-Cs(1)-O(3)     | 135.3(6)  | O(1)-Bi(2)-O(9)        | 77.1(7)   |
| O(6)#1-Cs(1)-O(6)#2   | 113.5(6)  | O(10)#3-Bi(2)-O(9)     | 132.3(7)  |
| O(3)-Cs(1)-O(6)#2     | 107.7(5)  | O(10)#12-Bi(2)-O(9)    | 78.7(6)   |
| O(6)#1-Cs(1)-O(11)#3  | 63.6(5)   | O(1)#8-Bi(2)-O(9)#8    | 77.1(7)   |
| O(3)-Cs(1)-O(11)#3    | 109.4(5)  | O(1)-Bi(2)-O(9)#8      | 82.6(7)   |
| O(6)#2-Cs(1)-O(11)#3  | 119.9(5)  | O(10)#3-Bi(2)-O(9)#8   | 78.7(6)   |
| O(6)#1-Cs(1)-O(8)     | 118.7(5)  | O(10)#12-Bi(2)-O(9)#8  | 132.3(7)  |
| O(3)-Cs(1)-O(8)       | 80.2(5)   | O(9)-Bi(2)-O(9)#8      | 141.4(9)  |
| O(6)#2-Cs(1)-O(8)     | 85.8(5)   | O(1)#8-Bi(2)-O(2)#3    | 151.9(7)  |
| O(11)#3-Cs(1)-O(8)    | 56.8(5)   | O(1)-Bi(2)-O(2)#3      | 76.0(7)   |
| O(6)#1-Cs(1)-O(5)#4   | 81.3(6)   | O(10)#3-Bi(2)-O(2)#3   | 57.3(7)   |
| O(3)-Cs(1)-O(5)#4     | 136.2(5)  | O(10)#12-Bi(2)-O(2)#3  | 71.0(7)   |
| O(6)#2-Cs(1)-O(5)#4   | 60.4(5)   | O(9)-Bi(2)-O(2)#3      | 75.1(6)   |
| O(11)#3-Cs(1)-O(5)#4  | 59.9(5)   | O(9)#8-Bi(2)-O(2)#3    | 130.9(6)  |
| O(8)-Cs(1)-O(5)#4     | 58.0(5)   | O(1)#8-Bi(2)-O(2)#12   | 76.0(7)   |
| O(6)#1-Cs(1)-O(12)#2  | 77.8(5)   | O(1)-Bi(2)-O(2)#12     | 151.9(7)  |
| O(3)-Cs(1)-O(12)#2    | 123.5(5)  | O(10)#3-Bi(2)-O(2)#12  | 71.0(7)   |
| O(6)#2-Cs(1)-O(12)#2  | 46.1(5)   | O(10)#12-Bi(2)-O(2)#12 | 57.3(7)   |
| O(11)#3-Cs(1)-O(12)#2 | 127.2(5)  | O(9)-Bi(2)-O(2)#12     | 130.9(6)  |
| O(8)-Cs(1)-O(12)#2    | 129.2(5)  | O(9)#8-Bi(2)-O(2)#12   | 75.1(6)   |
| O(5)#4-Cs(1)-O(12)#2  | 80.6(5)   | O(2)#3-Bi(2)-O(2)#12   | 106.2(9)  |
| O(6)#1-Cs(1)-O(7)#3   | 73.7(5)   | O(4)-Li(1)-O(11)#9     | 130(3)    |
| O(3)-Cs(1)-O(7)#3     | 73.3(5)   | O(4)-Li(1)-O(8)#13     | 114(3)    |
| O(6)#2-Cs(1)-O(7)#3   | 160.5(5)  | O(11)#9-Li(1)-O(8)#13  | 100(2)    |
| O(11)#3-Cs(1)-O(7)#3  | 45.3(5)   | O(4)-Li(1)-O(5)#10     | 103(2)    |
| O(8)-Cs(1)-O(7)#3     | 75.1(5)   | O(11)#9-Li(1)-O(5)#10  | 106(2)    |
| O(5)#4-Cs(1)-O(7)#3   | 104.8(5)  | O(8)#13-Li(1)-O(5)#10  | 101(2)    |
| O(12)#2-Cs(1)-O(7)#3  | 149.6(5)  | O(6)-Li(3)-O(12)#11    | 122(3)    |
| O(6)#1-Cs(1)-O(7)     | 162.2(5)  | O(6)-Li(3)-O(11)#1     | 112(3)    |

|                       |          |                        |           |
|-----------------------|----------|------------------------|-----------|
| O(3)-Cs(1)-O(7)       | 52.5(5)  | O(12)#11-Li(3)-O(11)#1 | 104(2)    |
| O(6)#2-Cs(1)-O(7)     | 69.5(5)  | O(6)-Li(3)-O(5)#15     | 111(3)    |
| O(11)#3-Cs(1)-O(7)    | 99.2(5)  | O(12)#11-Li(3)-O(5)#15 | 100(2)    |
| O(8)-Cs(1)-O(7)       | 43.5(5)  | O(11)#1-Li(3)-O(5)#15  | 106(2)    |
| O(5)#4-Cs(1)-O(7)     | 85.7(5)  | O(4)-P(1)-O(10)        | 113.1(12) |
| O(12)#2-Cs(1)-O(7)    | 112.2(5) | O(4)-P(1)-O(2)         | 110.7(12) |
| O(7)#3-Cs(1)-O(7)     | 98.2(5)  | O(10)-P(1)-O(2)        | 105.1(12) |
| O(6)#1-Cs(1)-O(3)#1   | 44.2(5)  | O(4)-P(1)-O(1)         | 110.0(12) |
| O(3)-Cs(1)-O(3)#1     | 111.8(4) | O(10)-P(1)-O(1)        | 109.6(12) |
| O(6)#2-Cs(1)-O(3)#1   | 101.3(5) | O(2)-P(1)-O(1)         | 108.1(13) |
| O(11)#3-Cs(1)-O(3)#1  | 106.5(5) | O(6)-P(2)-O(5)         | 114.7(12) |
| O(8)-Cs(1)-O(3)#1     | 162.8(5) | O(6)-P(2)-O(12)        | 111.7(13) |
| O(5)#4-Cs(1)-O(3)#1   | 111.9(5) | O(5)-P(2)-O(12)        | 111.2(13) |
| O(12)#2-Cs(1)-O(3)#1  | 55.2(5)  | O(6)-P(2)-O(3)         | 106.6(12) |
| O(7)#3-Cs(1)-O(3)#1   | 96.0(5)  | O(5)-P(2)-O(3)         | 104.0(12) |
| O(7)-Cs(1)-O(3)#1     | 153.7(4) | O(12)-P(2)-O(3)        | 108.1(11) |
| Li(3)#1-Cs(1)-O(3)#1  | 75.8(9)  | O(8)-P(3)-O(11)        | 111.2(13) |
| O(10)#6-Cs(2)-O(10)#3 | 101.5(7) | O(8)-P(3)-O(7)         | 108.0(12) |
| O(10)#6-Cs(2)-O(1)#7  | 63.8(5)  | O(11)-P(3)-O(7)        | 108.1(11) |
| O(10)#3-Cs(2)-O(1)#7  | 147.9(6) | O(8)-P(3)-O(9)         | 110.6(13) |
| O(10)#6-Cs(2)-O(1)    | 147.9(6) | O(11)-P(3)-O(9)        | 111.7(12) |
| O(10)#3-Cs(2)-O(1)    | 63.8(5)  | O(7)-P(3)-O(9)         | 107.1(11) |

#1  $-x+1/2, y-1/2, -z+1$     #2  $-x+1/2, y+1/2, -z+1$   
 #3  $x, y-1, z$     #4  $x, y, z+1$     #5  $x, y-1, z+1$   
 #6  $-x+1, y-1, -z$     #7  $-x+1, y, -z$     #8  $-x+1, y, -z+1$   
 #9  $x, y, z-1$     #10  $x, y+1, z$     #11  $-x+1/2, y+1/2, -z$   
 #12  $-x+1, y-1, -z+1$     #13  $x, y+1, z-1$     #14  $-x+1/2, y+3/2, -z$   
 #15  $-x+1/2, y-1/2, -z$     #16  $-x+1/2, y-3/2, -z$   
 #17  $-x+1, y+1, -z+1$
